# Supplementary material for: Formula feeding practice and associated factors among mothers with infants 0–6 months of age in Addis Ababa, Ethiopia: a community-based cross-sectional study
Source: Springer Nature journal article supplement (doi:10.1186/s13052-021-01010-x), 2021-03-09

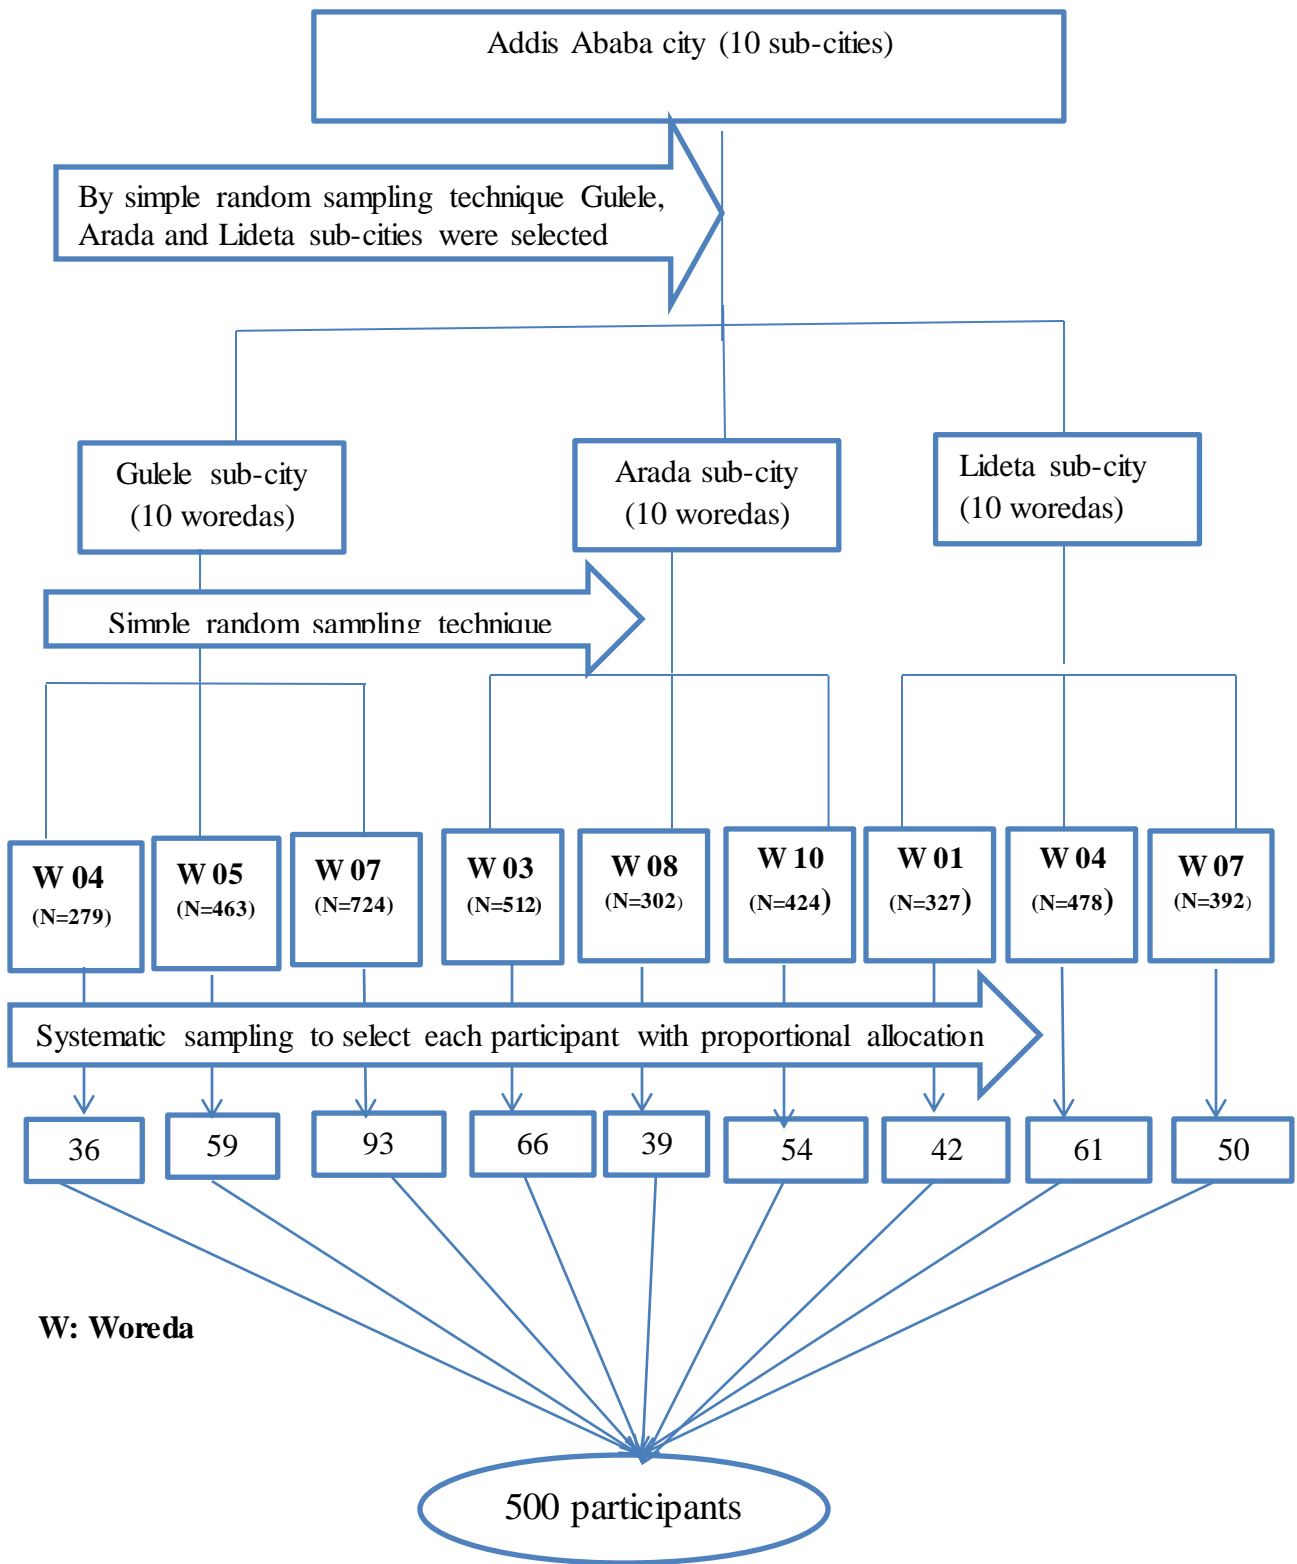

Supplement: MOESM1 [file 18944670]
